# Supplementary material
Source: MDPI journal article supplement (https://www.mdpi.com/1424-2818/11/11/215)
Supplement: s1 [file s1]

|                                                                       | 1961 | 1990 | 1996 | 2008 | 2017 |
|-----------------------------------------------------------------------|------|------|------|------|------|
| OCHROPHYTA                                                            |      |      |      |      |      |
| <i>Padina pavonica</i> (Linnaeus) Thivy, 1960                         |      |      |      |      | +    |
| RHODOPHYTA                                                            |      |      |      |      |      |
| <i>Acrosymphyton purpuriferum</i> (J.Agardh) Sjöstedt, 1926           |      |      | +    |      |      |
| <i>Lithophyllum stictiforme</i> (J.E. Areschoug) Hauck, 1877          | +    | +    | +    | +    | +    |
| <i>Osmundea pelagosae</i> (Schiffner) K.W.Nam, 1994                   |      |      |      |      | +    |
| <i>Peyssonnelia squamaria</i> (S.G.Gmelin) Decaisne ex J.Agardh, 1842 | +    | +    | +    | +    | +    |
| <i>Womersleyella setacea</i> (Hollenberg) R.E.Norris, 1992            |      |      | +    | +    | +    |
| CHLOROPHYTA                                                           |      |      |      |      |      |
| <i>Caulerpa cylindracea</i> Sonder, 1845                              |      |      |      | +    | +    |
| <i>Flabellia petiolata</i> (Turra) Nizamuddin, 1987                   | +    | +    | +    | +    | +    |
| <i>Halimeda tuna</i> (J.Ellis & Solander) J.V.Lamouroux, 1816         |      |      | +    | +    |      |
| PORIFERA                                                              |      |      |      |      |      |
| <i>Acanthella acuta</i> Schmidt, 1862                                 | +    | +    |      | +    | +    |
| <i>Agelas oroides</i> (Schmidt, 1864)                                 | +    | +    | +    | +    | +    |
| <i>Axinella damicornis</i> (Esper, 1794)                              | +    | +    | +    | +    | +    |
| <i>Axinella verrucosa</i> (Esper, 1794)                               |      |      | +    | +    | +    |
| <i>Chondrosia reniformis</i> Nardo, 1847                              |      | +    |      |      | +    |
| <i>Clathrina clathrus</i> (Schmidt, 1864)                             |      | +    |      |      | +    |
| <i>Cliona celata</i> Grant, 1826                                      |      |      |      | +    |      |
| <i>Crambe crambe</i> (Schmidt, 1862)                                  | +    | +    | +    | +    | +    |
| <i>Crella pulvinar</i> (Schmidt, 1868)                                |      |      | +    | +    | +    |
| <i>Dysidea avara</i> (Schmidt, 1862)                                  |      |      |      |      | +    |
| <i>Dysidea fragilis</i> (Montagu, 1814)                               |      |      |      | +    | +    |
| <i>Eurypon major</i> Sarà & Siribelli, 1960                           |      |      |      | +    | +    |
| <i>Haliclona fulva</i> (Topsent, 1893)                                |      |      |      |      | +    |
| <i>Haliclona rosea</i> (Bowerbank, 1866)                              |      | +    |      |      |      |
| <i>Ircinia oros</i> (Schmidt, 1864)                                   | +    | +    | +    |      | +    |
| <i>Ircinia variabilis</i> (Schmidt, 1862)                             |      |      | +    | +    | +    |
| <i>Leucosolenia variabilis</i> Haeckel, 1870                          | +    |      |      |      | +    |
| <i>Petrosia ficiformis</i> (Poiret, 1789)                             |      |      |      |      | +    |
| <i>Phorbastenia tenacior</i> (Topsent, 1925)                          |      | +    | +    |      | +    |
| <i>Pleraplysilla spinifera</i> (Schulze, 1879)                        |      |      |      | +    | +    |
| <i>Sarcotragus foetidus</i> Schmidt, 1862                             |      | +    |      |      | +    |
| <i>Spirastrella cunctatrix</i> Schmidt, 1868                          |      |      | +    | +    | +    |
| <i>Spongia officinalis</i> Linnaeus, 1759                             | +    |      | +    |      |      |
| <i>Tethya citrina</i> Sarà & Melone, 1965                             |      |      |      |      | +    |
| CNIDARIA                                                              |      |      |      |      |      |
| <i>Alcyonium coralloides</i> (Pallas, 1766)                           | +    | +    |      |      |      |
| <i>Caryophyllia inornata</i> (Duncan, 1878)                           | +    | +    |      | +    | +    |
| <i>Cerianthus membranaceus</i> (Gmelin, 1791)                         |      |      |      |      | +    |
| <i>Cladocora caespitosa</i> (Linnaeus, 1767)                          |      |      |      |      | +    |
| <i>Eudendrium racemosum</i> (Cavolini, 1785)                          |      | +    | +    | +    | +    |
| <i>Eunicella singularis</i> (Esper, 1791)                             | +    | +    |      |      |      |
| <i>Eunicella verrucosa</i> (Pallas, 1766)                             | +    |      | +    | +    | +    |

|                                                               |   |   |   |   |   |
|---------------------------------------------------------------|---|---|---|---|---|
| <i>Leptogorgia sarmentosa</i> (Esper, 1789)                   | + |   | + | + | + |
| <i>Leptopsammia pruvoti</i> Lacaze-Duthiers, 1897             | + | + | + | + | + |
| <i>Paramuricea clavata</i> (Risso, 1826)                      | + | + | + | + | + |
| <i>Paramuricea macrospina</i> (Koch, 1882)                    |   |   | + |   |   |
| <i>Parazoanthus axinellae</i> (Schmidt, 1862)                 | + | + | + | + | + |
| <i>Phyllangia americana mouchezii</i> (Lacaze-Duthiers, 1897) | + |   | + |   | + |
| <i>Polycyathus muelleri</i> (Abel, 1959)                      |   | + | + |   |   |
| <i>Savalia savaglia</i> (Bertoloni, 1819)                     | + |   |   |   |   |
| ANNELIDA                                                      |   |   |   |   |   |
| <i>Protula tubularia</i> (Montagu, 1803)                      |   |   |   | + | + |
| <i>Salmacina dysteri</i> (Huxley, 1855)                       |   | + | + | + | + |
| <i>Serpula vermicularis</i> Linnaeus, 1767                    |   |   | + |   | + |
| BRYOZOA                                                       |   |   |   |   |   |
| <i>Cellaria fistulosa</i> (Linnaeus, 1758)                    | + |   | + |   | + |
| <i>Myriapora truncata</i> (Pallas, 1766)                      |   |   |   |   | + |
| <i>Pentapora fascialis</i> (Pallas, 1766)                     | + | + | + |   | + |
| <i>Reptadeonella violacea</i> (Johnston, 1847)                |   |   | + |   |   |
| <i>Reteporella grimaldii</i> (Jullien, 1903)                  | + | + | + | + | + |
| <i>Schizomavella mamillata</i> (Hincks, 1880)                 |   |   |   |   | + |
| <i>Schizoporella dunkeri</i> (Reuss, 1848)                    |   |   |   | + | + |
| <i>Smittina cervicornis</i> (Pallas, 1766)                    | + |   | + | + | + |
| <i>Turbicellepora incrassata</i> (Lamouroux, 1816)            |   |   | + |   |   |
| CHORDATA                                                      |   |   |   |   |   |
| <i>Halocynthia papillosa</i> (Linnaeus, 1767)                 | + | + | + | + | + |
| <i>Microcosmus sabatieri</i> Roule, 1885                      |   | + |   |   |   |
